# Supplementary material for: Development of a Novel Positron Emission Tomography (PET) Radiotracer Targeting Bromodomain and Extra-Terminal Domain (BET) Family Proteins
Source: PubMed Central journal article supplement (PMC7434981; doi:10.3389/fmolb.2020.00198), 2020-08-12
Supplement: Image_1.pdf [file Image_1.pdf]

## *Supplementary Material*

### **Development of a Novel Positron Emission Tomography (PET) Radiotracer Targeting Bromodomain and Extra-Terminal Domain (BET) Family Proteins**

Ping Bai<sup>1,2,3</sup>, Yu Lan<sup>2</sup>, Hao Wang<sup>2</sup>, Zude Chen<sup>2</sup>, Stephanie Fiedler<sup>2</sup>, Robin Striar<sup>2</sup>, Xiaoxia Lu<sup>1\*</sup>, Changning Wang<sup>2\*</sup>

<sup>1</sup>Chengdu Institute of Biology, Chinese Academy of Sciences, Chengdu 610041, PR China

<sup>2</sup>Athinoula A. Martinos Center for Biomedical Imaging, Department of Radiology, Massachusetts General Hospital, Harvard Medical School, Charlestown, MA 02129, USA.

<sup>3</sup>University of Chinese Academy of Sciences, Beijing 100049, PR China

\*To whom correspondence should be addressed:

Changning Wang, PhD

Martinos Center for Biomedical Imaging at Massachusetts General Hospital, Harvard Medical School

149 13th Street, Suite 2301

Charlestown, MA 02129

617-724-3983

[cwang15@mgh.harvard.edu](mailto:cwang15@mgh.harvard.edu)

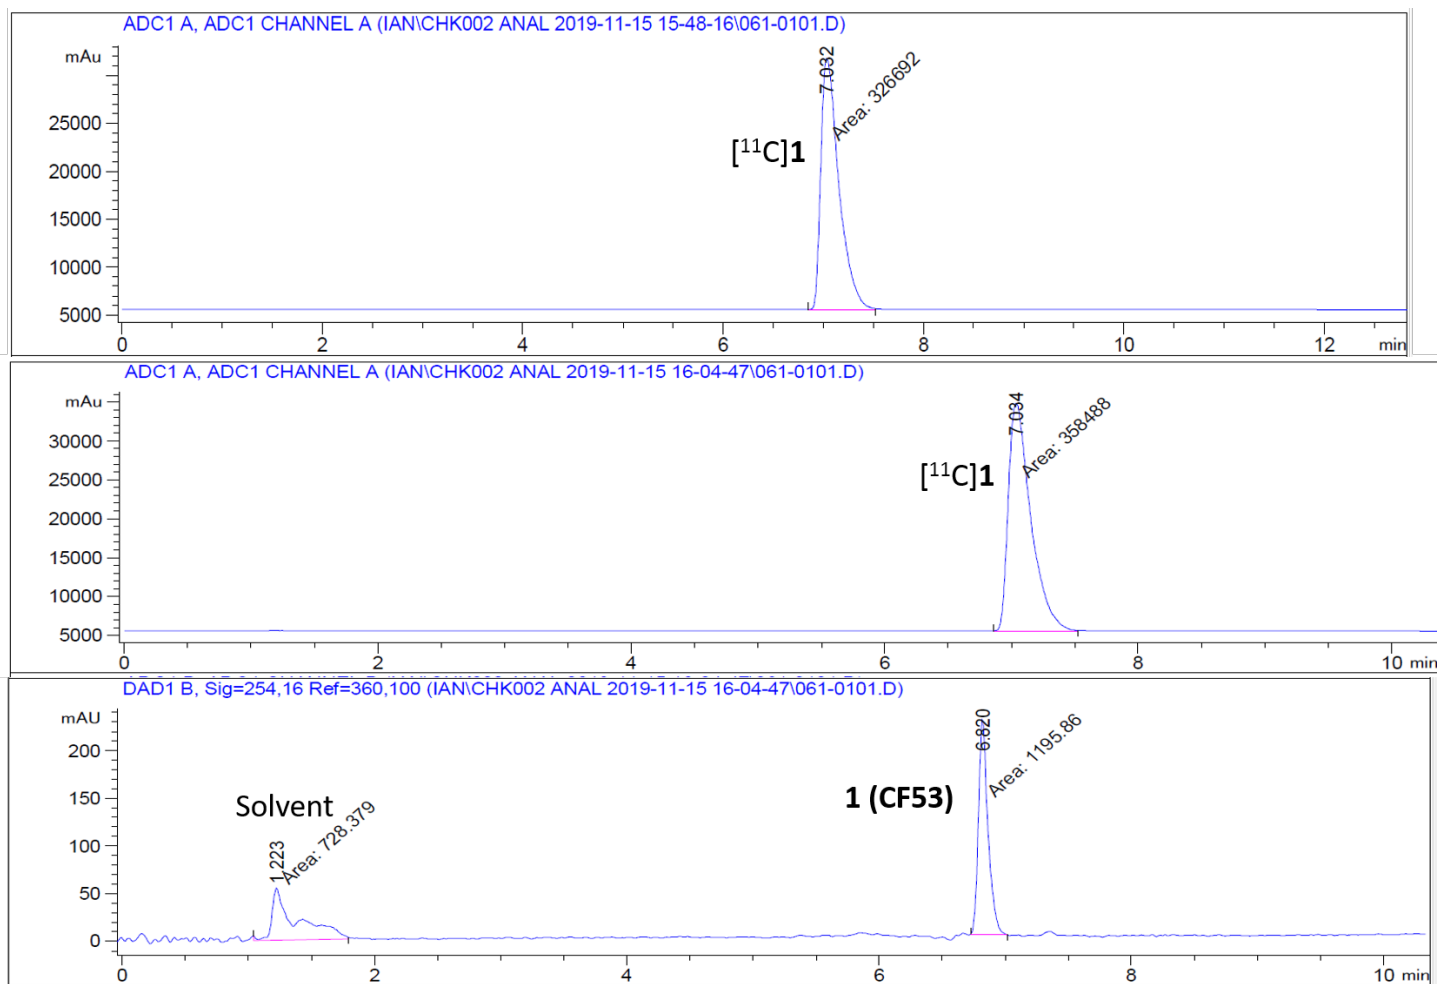

Supplementary Figure S1. The HPLC chromatogram of [<sup>11</sup>C]1 and the co-injection with standard 1 (CF53).
